# Supplementary material for: Phenotype study of multifoliolate leaf formation in Trifolium alexandrinum L
Source: PeerJ. 2021 Mar 1;9:e10874. doi: 10.7717/peerj.10874 (PMC7936568; doi:10.7717/peerj.10874)
Supplement: Supplemental Information 1 [file peerj-09-10874-s001.xls]

## Sheet: Sheet1
Penetrance of multifoliate trait in Penta-1 year 1						Penetrance of multifoliate trait in T. alexandrinum x T. apertum year 1
S.No.	Progeny	Total Plants	Tri (%)	Multi (%)			Progeny	Total plants	(%) T	(%) M
1	06-1	35	0	100			04-19-1	11	36.3636	63.6364
2	06-2	38	0	100			04-23-1	34	14.7059	85.2941
3	06-3	45	2.22222	97.7778			04-23-2	3	0	100
4	06-4	41	2.43902	97.561			04-35-1	13	61.5385	38.4615
5	06-5	37	0	100			04-35-2	5	0	100
6	06-6	52	0	100			04-35-3	1	0	100
7	06-7	56	0	100			04-36-1	3	33.3333	66.6667
8	06-8	63	0	100			04-37-1	9	0	100
9	06-9	32	0	100			04-37-2	9	22.2222	77.7778
10	06-10	63	1.5873	98.4127			04-37-3	2	100	0
11	06-11	77	1.2987	98.7013			04-37-4	1	100	0
12	06-12	65	0	100			04-37-5	1	100	0
13	06-13	59	5.08475	94.9153			04-38-1	13	100	0
14	06-14	71	0	100			04-38-2	2	50	50
15	06-15	62	0	100			04-38-3	1	100	0
16	06-16	53	0	100			04-38-4	1	0	100
17	06-17	59	0	100			04-38-5	1	100	0
18	06-18	59	0	100			04-38-6	2	100	0
19	06-19	33	3.0303	96.9697			04-38-7	2	0	100
20	06-20	29	6.89655	93.1034			04-38-8	8	37.5	62.5
21	06-21	34	2.94118	97.0588			04-39-1	4	0	100
22	06-22	38	5.26316	94.7368			04-39-2	1	0	100
23	06-23	48	4.16667	95.8333			04-39-3	1	0	100
24	06-24	30	0	100			04-39-4	1	0	100
25	06-25	47	2.12766	97.8723			04-39-5	1	0	100
26	06-26	57	0	100			04-39-6	3	33.3333	66.6667
27	06-27	57	0	100			04-39-7	13	0	100
28	06-28	49	0	100			04-39-8	4	50	50
29	06-29	64	0	100			04-39-9	4	75	25
30	06-30	34	5.88235	94.1176			04-39-10	12	25	75
							04-39-11	2	0	100
							04-39-12	5	0	100
							04-39-13	3	33.3333	66.6667
							04-39-14	1	100	0
							04-39-15	4	100	0
							04-39-16	2	0	100
							04-39-17	17	0	100
							04-39-18	2	0	100
							04-39-19	1	100	0
							04-39-20	1	100	0
							04-39-21	28	35.7143	64.2857
							04-39-22	8	12.5	87.5
							04-39-23	19	31.5789	68.4211
							04-39-24	1	0	100
							04-39-25	4	0	100
							04-39-26	5	100	0
							04-39-27	10	0	100
							04-39-28	5	100	0
							04-39-29	7	85.7143	14.2857
							04-40-1	10	10	90
							04-40-2	13	0	100
							04-43-1	4	25	75
							04-47-1	5	20	80
							04-47-2	9	33.3333	66.6667
							04-47-3	71	64.7887	35.2113
							04-47-4	7	85.7143	14.2857
							04-47-5	26	3.84615	96.1538
							04-56-1	61	0	100

## Sheet: Sheet15
after second cut in T. alexandrinum x T. apertum. Year 1
	N1	N2	N3	N4	N5	N6
Total Leaves	223	223	222	209	176	108
T%	37.2197	25.1121	25.6757	17.7033	15.3409	17.5926
Q%	4.4843	11.2108	7.20721	5.74163	1.70455	0.925926
P%	58.296	63.6771	67.1171	76.555	82.9545	80.5556
Hx%	0	0	0	0	0	0.925926
after second cut in multifoliate plants of segregating progenies of T. alexandrinum x T. apertum. Year 2
	N1	N2	N3	N4	N5	N6	N7	N8	N9	N10	N11	N12
Total Leaves	631	631	631	629	623	604	570	517	446	358	249	157
T%	28.6846	21.5531	19.8098	15.7393	15.7303	15.3974	16.4912	14.8936	15.0224	14.8045	10.4418	9.55414
Q%	5.54675	7.13154	7.29002	8.42607	6.42055	6.95364	4.73684	5.80271	4.03587	3.07263	3.21285	0.636943
P%	65.7686	71.3154	72.9002	75.8347	77.8491	77.649	78.7719	79.3037	80.9417	82.1229	86.3454	89.8089
after second cut in progenies of Penta-1
year 2	N1	N2	N3	N4	N5	N6	N7	N8	N9	N10	N11	N12	N13	N14	N15	N16	N17
Total Leaves	2678	2678	2678	2675	2674	2670	2660	2633	2586	2490	2374	2148	1857	1545	1192	845	592
T%	6.27334	4.14488	4.10754	3.7757	3.44054	3.48315	3.30827	3.30422	2.82289	2.93173	2.44313	2.04842	1.77706	1.74757	1.00671	1.18343	0.471698
Q%	2.53921	3.73413	2.87528	2.39252	1.98205	1.38577	1.20301	0.987467	0.696056	0.281124	0.210615	0.232775	0.161551	0	0.0838926	0	0
P%	91.1501	92.0836	93.0172	93.757	94.5026	95.0187	95.3383	95.5564	96.2877	96.5462	96.925	97.3929	97.4152	97.6052	98.0705	98.1065	99.0566
Hx%	0	0.0373413	0	0.0747664	0.0747943	0.11236	0.112782	0.151918	0.154679	0.200803	0.336984	0.232775	0.646204	0.582524	0.755034	0.591716	0.471698
Hp%	0.0373413	0	0	0	0	0	0.037594	0	0.0386698	0.0401606	0.084246	0.0931099	0	0.0647249	0.0838926	0.118343	0
before cut in segregating progenies of T. alexandrinum x T. Apertum
year 2	N1	N2	N3	N4	N5	N6	N7	N8	N9	N10	N11
Total Leaves	216	214	215	212	204	195	180	151	125	86	47
T%	81.0185	62.6168	37.6744	23.1132	19.1176	16.4103	10.5556	12.5828	11.2	9.30233	0
Q%	6.94444	15.8879	13.9535	19.8113	8.82353	6.66667	8.33333	3.97351	4	1.16279	6.38298
P%	12.037	21.4953	47.907	56.6038	71.5686	76.4103	80	82.7815	83.2	88.3721	93.617
Hx%	0	0	0.465116	0.471698	0.490196	0.512821	1.11111	0.662252	1.6	1.16279	0
before cut in progenies of Penta-1
year 2	N1	N2	N3	N4	N5	N6	N7	N8	N9	N10	N11	N12
Total leaves	898	898	898	897	892	883	843	792	669	509	328	162
T%	69.7105	29.1759	11.1359	8.24972	5.04484	4.19026	3.67734	4.16667	4.18535	3.92927	3.96341	2.46914
Q%	12.3608	27.0601	16.9265	8.3612	5.38117	3.39751	2.84698	1.76768	1.79372	2.55403	0.914634	1.23457
P%	17.9287	43.7639	71.7149	82.9431	88.7892	91.5062	91.6963	92.298	92.2272	91.1591	93.9024	95.0617
Hx%	0	0	0.111359	0.222965	0.672646	0.566251	1.18624	1.26263	1.19581	1.76817	1.21951	1.23457
Hp%	0	0	0.111359	0.222965	0.112108	0.339751	0.59312	0.505051	0.597907	0.589391	0	0
after second cut in Penta-1
year 1	N1	N2	N3	N4	N5	N6	N7	N8	N9
Total Leaves	1327	1330	1329.03	1325.03	1286	1146.07	867	500.033	188
T%	8.66616	6.16541	5.94417	5.35836	4.51011	4.45	3.34487	2.9998	1.59574
Q%	6.33007	6.54135	4.96602	4.22631	3.26594	2.61765	2.30681	0.59996	0
P%	84.9284	87.218	88.8616	90.0355	91.5241	91.6177	93.1949	95.3936	97.3404
Hx%	0.075358	0.075188	0.225728	0.377349	0.699844	1.30882	1.1534	0.999933	1.06383
Hp%	0	0	0.00250809	0.00251566	0	0.005817	0	0.00666622	0
before cut in segregating progenies of T. alexandrinum x T. apertum.
year 1	N1	N2	N3	N4	N5	N6	N7
Total Leaves	497	496	488	445	324	70	10
T%	86.3179	78.4274	56.5574	41.3483	35.1852	31.4286	10
Q%	7.84708	9.47581	14.1393	14.6067	9.5679	14.2857	20
P%	5.83501	12.0968	29.3033	44.0449	54.6296	54.2857	70
Hx%	0	0	0	0	0.617284	0	0
leaves before cut in Penta-1
year 1	N1	N2	N3	N4	N5	N6	N7	N8	N9
Total Leaves	499	499	499	499	496	478	445	347	181
T%	50.501	29.4589	17.6353	10.4208	7.05645	5.23013	3.82022	3.7464	2.76243
Q%	21.2425	22.4449	10.8216	7.81563	5.24194	4.39331	2.69663	1.72911	0
P%	28.2565	47.8958	71.3427	81.7635	87.0968	89.749	92.3596	92.7954	96.6851
Hx%	0	0.200401	0.200401	0	0.403226	0.41841	0.898876	1.15274	0.552486
Hp%	0	0	0	0	0.201613	0.209205	0.224719	0.576369	0

## Sheet: Sheet14
Leaf arrangement on multifoliate plants of segregating progenies of T. alexandrinum x T. apertum after second cut in (%) year 1
Progeny	No. of plants		Trifoliate	Quadrifoliate	Pentafoliate	Hexafoliate
04-35-1	10	Average	69.6827	4.45076	25.8665	0
		Range	0-100	0-18.75	0-100	0
04-35-2	4	Average	0	0	94.2857	5.71429
		Range	0	0	71.43-100	0-28.57
04-35-3	1	Average	38.8889	27.7778	33.3333	0
		Range	38.8889	27.7778	33.3333	0
04-37-1	8	Average	27.0518	21.3952	51.553	0
		Range	0-61.11	5.56-50	33.33-70.00	0
04-37-2	6	Average	11.4379	4.18301	84.3791	0
		Range	0-35.29	0-13.33	52.94-100	0
04-37-5	1	Average	0	0	100	0
		Range	0	0	100	0
04-38-1	5	Average	100	0	0	0
		Range	100	0	0	0
04-38-2	2	Average	13.8889	8.33333	77.7778	0
		Range	0-27.78	0-16.67	55.56-100	0
04-38-4	1	Average	9.09091	9.09091	81.8182	0
		Range	9.09091	9.09091	81.8182	0
04-38-6	1	Average	44.4444	22.2222	33.3333	0
		Range	44.4444	22.2222	33.3333	0
04-38-7	1	Average	18.1818	27.2727	54.5455	0
		Range	18.1818	27.2727	54.5455	0
04-39-1	4	Average	0	0	100	0
		Range	0	0	100	0
04-39-2	1	Average	0	0	100	0
		Range	0	0	100	0
04-39-3	1	Average	0	0	100	0
		Range	0	0	100	0
04-39-4	1	Average	0	0	100	0
		Range	0	0	100	0
04-39-5	1	Average	0	0	100	0
		Range	0	0	100	0
04-39-6	3	Average	35.6938	18.2935	46.0128	0
		Range	5.26-81.82	9.09-30	9.09-78.95	0
04-39-7	8	Average	2.08333	4.16667	93.75	0
		Range	0-16.67	0-33.33	50-100	0
04-39-8	1	Average	100	0	0	0
		Range	100	0	0	0
04-39-9	2	Average	85.7143	14.2857	0	0
		Range	71.43-100	0-28.57	0	0
04-39-10	10	Average	1.84314	7.61111	90.5458	0
		Range	0-11.76	0-41.67	58.33-100	0
04-39-12	3	Average	10.1038	23.199	66.6972	0
		Range	7.69-14.29	7.69-33.33	57.14-84.62	0
04--39-13	3	Average	0	6.66667	93.3333	0
		Range	0	0-20	80-100	0
04-39-14	1	Average	100	0	0	0
		Range	100	0	0	0
04-39-15	4	Average	100	0	0	0
		Range	100	0	0	0
04-39-16	2	Average	0	0	100	0
		Range	0	0	100	0
04-39-17	15	Average	0	0	100	0
		Range	0	0	100	0
04-39-18	2	Average	0	0	100	0
		Range	0	0	100	0
04-39-19	1	Average	100	0	0	0
		Range	100	0	0	0
04-39-20	1	Average	0	0	100	0
		Range	0	0	100	0

## Sheet: Sheet20
Leaf arrangement on multifoliate plants of segregating progenies of T. alexandrinum x T. apertum before cut in (%) year 2
Progeny	No. of plants		Trifoliate	Quadrifoliate	Pentafoliate	Hexafoliate
04-35-1-1	1	Average	84.6154	15.3846	0	0
		Range	84.6154	15.3846	0	0
04-37-2-1	6	Average	21.5368	8.8961	69.5671	0
		Range	10.00-42.86	0.00-20.00	42.86-90.00	0
04-37-2-2	13	Average	24.155	20.9832	54.8618	0
		Range	0.00-66.67	0.00-50.00	16.67-75.00	0
04-39-1-1	7	Average	23.7179	0	76.2821	0
		Range	0.00-100	0	0.00-100	0
04-39-1-2	8	Average	25.6647	27.5397	46.7956	0
		Range	11.11-42.86	0.00-60.00	20.00-75.00	0
04-39-4-1	8	Average	16.2753	1.13636	82.5884	0
		Range	0.00-100	0.00-9.09	0.00-100	0
04-39-5-1	1	Average	37.5	12.5	50	0
		Range	37.5	12.5	50	0
04-39-7-1	2	Average	60	0	40	0
		Range	20.00-100	0	0.00-80.00	0
04-39-7-2	6	Average	25.9259	6.06061	68.0135	0
		Range	18.18-36.36	0.00-18.18	63.64-77.78	0
04-39-8-1	5	Average	53.4545	13.6364	32.9091	0
		Range	10.00-100	0.00-20.00	0.00-70.00	0
04-39-10-1	8	Average	14.6528	5.38194	79.9653	0
		Range	0.00-33.33	0.00-12.50	58.33-100	0
04-39-10-2	8	Average	31.7411	10.3621	57.8968	0
		Range	12.50-71.43	0.00-25.00	14.29-75.00	0
04-39-10-3	1	Average	30	0	70	0
		Range	30	0	70	0
04-39-12-1	8	Average	23.7374	8.88889	67.3737	0
		Range	11.11-33.33	0.00-30.00	40.00-81.82	0
04-39-15-1	2	Average	23.8095	16.6667	59.5238	0
		Range	14.29-33.33	0.00-33.33	33.33-85.71	0
04-39-17-1	7	Average	25.0804	3.78788	71.1317	0
		Range	0.00-57.14	0.00-18.18	42.86-100	0
04-39-18-1	5	Average	12.993	2	85.007	0
		Range	7.69-20.00	0.00-10.00	80.00-92.31	0
04-39-21-1	4	Average	47.2222	27.7778	25	0
		Range	22.22-100	0.00-55.56	0.00-66.67	0
04-39-23-1	4	Average	23.143	18.5975	58.2595	0
		Range	20.00-27.27	9.09-23.08	53.85-63.64	0
04-39-26-1	1	Average	60	40	0	0
		Range	60	40	0	0
04-39-29-1	5	Average	43.7778	4.44444	51.7778	0
		Range	0.00-100	0.00-11.11	0.00-100	0
04-39-29-2	3	Average	100	0	0	0
		Range	100	0	0	0
04-47-1-1	2	Average	19.6429	7.14286	66.0714	7.14286
		Range	14.29-25.00	0.00-14.29	57.14-75.00	0.00-14.29
04-47-3-1	8	Average	65.6448	10.0992	24.256	0
		Range	14.29-100	0.00-30.00	0.00-85.71	0
04-47-3-2	1	Average	22.2222	0	77.7778	0
		Range	22.2222	0	77.7778	0
04-47-3-3	5	Average	15.0769	10	74.9231	0
		Range	0.00-40.00	0.00-50.00	50.00-100	0
04-47-3-4	2	Average	50	5.55556	44.4444	0
		Range	0.00-100	0.00-11.11	0.00-88.89	0
04-47-3-5	2	Average	84.5238	15.4762	0	0
		Range	83.33-85.71	14.29-16.67	0	0
04-47-3-6	4	Average	61.6883	21.1039	17.2078	0
		Range	18.18-100	0.00-28.57	0.00-54.55	0
04-47-3-7	2	Average	78.5714	0	21.4286	0
		Range	57.14-100	0	0.00-42.86	0
04-47-3-8	7	Average	57.1429	1.42857	41.4286	0
		Range	0.00-100	0.00-10.00	0.00-100	0
04-47-4-1	1	Average	100	0	0	0
		Range	100	0	0	0
04-47-4-2	3	Average	78.7879	3.0303	18.1818	0
		Range	36.36-100	0.00-9.09	0.00-54.55	0
04-47-5-1	1	Average	12.5	12.5	75	0
		Range	12.5	12.5	75	0
04-47-5-2	1	Average	40	0	60	0
		Range	40	0	60	0
04-47-5-3	2	Average	67.8571	13.3929	18.75	0
		Range	50.00-85.71	12.50-14.29	0.00-37.50	0
04-47-5-4	6	Average	21.0317	8.92857	70.0397	0
		Range	0.00-50.00	0.00-25.00	25.00-100	0
04-47-5-5	6	Average	37.9167	25.787	36.2963	0
		Range	11.11-55.56	12.50-33.33	11.11-66.67	0
04-47-5-6	2	Average	45.8333	29.1667	25	0
		Range	25.00-66.67	25.00-33.33	0.00-50.00	0
0-4-47-5-7	6	Average	45.1058	0	54.8942	0
		Range	11.11-100	0	0-88.89	0
04-56-1-1	6	Average	39.8485	6.73401	53.4175	0
		Range	0.00-100	0.00-22.22	0.00-100	0
04-56-1-2	8	Average	10.6901	6.41414	82.8958	0
		Range	0.00-22.22	0.00-22.22	77.78-92-31	0
04-56-1-3	4	Average	15.5556	0	84.4444	0
		Range	0.00-40.00	0	60.00-100	0
04-56-1-4	9	Average	1.5873	3.6075	92.6447	2.16049
		Range	0.00-14.29	0.00-18.18	81.82-100	0.00-11.11
04-56-1-5	4	Average	2.08333	14.3056	83.6111	0
		Range	0.00-8.33	8.33-22.22	77.78-90.00	0
04-56-1-6	2	Average	100	0	0	0
		Range	100	0	0	0
04-56-1-7	2	Average	16.25	10	73.75	0
		Range	12.50-20.00	0.00-20.00	60.00-87.50	0
04-56-1-8	2	Average	16.6667	8.33333	75	0
		Range	0.00-33.33	0.00-16.67	66.67-83.33	0
04-56-1-9	5	Average	67.1465	32.8535	0	0
		Range	44.44-100	0.00-55.56	0	0
04-56-1-10	1	Average	0	0	100	0
		Range	0	0	100	0

## Sheet: Sheet63
(6) Subcultured in RL media
Genotype		Plant no.	No. of shoots	Root Length (cm.)	Total no. of leaves	Expression of multifoliate leaves after 30 days of culture
						%T	%Q	%P	%Hx
Wardan-Trifoliate	W-T-(t)	W-36(Tt-t)	2	0	18	100	0	0	0
		W-36(Tt-t)	5	0	19	100	0	0	0
		W-36(Tt-t)	4	0	21	85.7143	9.52381	4.7619	0
		W-36(Tt-t)	2	0	12	100	0	0	0
PI-Pentafoliate	PI-P-(p)	PI-2(Pp-p)	3	6.6	7	57.1429	42.8571	0	0
		PI-2(Pp-p)	1	0	3	0	100	0	0
		PI-12(Pp-pp)	2	0	14	64.2857	14.2857	21.4286	0
		PI-12(Pp-pp)	2	5.2	10	60	20	20	0
		PI-12(Pp-pp)	1	8	15	0	0	100	0
		PI-12(Pp-pp)	2	5.1	14	71.4286	14.2857	14.2857	0
		PI-19(Pp-pp)	3	6.15	10	0	0	100	0
		PI-19(Pp-pp)	3	5.5	15	13.3333	33.3333	53.3333	0
		PI-19(Pp-pp)	2	7.225	11	0	0	100	0
		PI-19(Pp-pp)	1	0	6	0	0	100	0
PI-Multifoliate(P)	PI-MP(p)	PI-3(Mp-p)	2	0	12	50	41.6667	8.33333	0
		PI-4(Mp-pp)	3	10.5	21	71.4286	23.8095	4.7619	0
		PI-4(Mp-pp)	1	0	8	75	12.5	12.5	0
		PI-4(Mp-pp)	1	8.1	14	57.1429	21.4286	21.4286	0
		PI-4(Mp-pp)	2	0	25	20	16	64	0
		PI-4(Mp-pp)	3	2.4	29	34.4828	27.5862	37.931	0
		PI-4(Mp-pp)	2	0	18	0	11.1111	88.8889	0
		PI-4(Mp-pp)	2	0	15	93.3333	6.66667	0	0
		PI-5(Mp-pp)	1	1.2	8	25	37.5	37.5	0
		PI-5(Mp-pp)	2	0	12	50	25	25	0
		PI-5(Mp-pp)	1	0	5	40	20	40	0
		PI-5(Mp-pp)	2	0	10	20	20	60	0
		PI-5(Mp-pp)	3	0	17	76.4706	23.5294	0	0
		PI-5(Mp-pp)	1	0	9	33.3333	44.4444	22.2222	0
		PI-25(Mp-pp)	2	8.58	13	30.7692	23.0769	46.1538	0
		PI-28(Mp-p)	3	0	3	66.6667	33.3333	0	0
		PI-28(Mp-p)	2	21.975	13	61.5385	23.0769	15.3846	0
		PI-28(Mp-p)	2	3.83333	11	72.7273	0	27.2727	0
	PI-MP(q)	PI-4(Mp-pq)	2	5.9	18	88.8889	11.1111	0	0
		PI-4(Mp-pq)	2	0	15	80	20	0	0
		PI-4(Mp-pq)	2	0	12	75	16.6667	8.33333	0
		PI-4(Mp-pq)	1	0	11	90.9091	9.09091	0	0
		PI-4(Mp-pq)	2	0	11	100	0	0	0
		PI-21(Mp-tq)	3	0	18	50	11.1111	38.8889	0
		PI-21(Mp-tq)	3	0	11	63.6364	9.09091	27.2727	0
		PI-21(Mp-tq)	2	0	6	33.3333	16.6667	50	0
	PI-MP(t)	PI-4(Mp-pt)	1	11	7	28.5714	42.8571	14.2857	14.2857
		PI-4(Mp-pt)	1	8.46667	11	27.2727	54.5455	18.1818	0
		PI-13(Mp-t)	1	9.4	7	100	0	0	0
		PI-13(Mp-t)	1	16	5	100	0	0	0
		PI-24(Mp-tt)	2	8	8	25	25	50	0
		PI-25(Mp-pt)	3	15.5333	10	60	0	40	0
		PI-25(Mp-pt)	3	11.2	14	28.5714	21.4286	50	0
		PI-25(Mp-pt)	3	5.9	21	47.619	19.0476	33.3333	0
		PI-25(Mp-pt)	2	4.23333	15	46.6667	6.66667	46.6667	0
		PI-25(Mp-pt)	1	2.1	13	69.2308	30.7692	0	0
		PI-32(M-pt)	2	0	12	41.6667	33.3333	25	0
		PI-32(M-pt)	1	0	6	100	0	0	0
		PI-33(Mp-pt)	2	0	7	71.4286	28.5714	0	0
		PI-33(Mp-pt)	2	0	9	55.5556	22.2222	22.2222	0
		PI-33(Mp-pt)	2	0	15	13.3333	6.66667	80	0
		PI-33(Mp-pt)	2	0	14	78.5714	7.14286	14.2857	0
		PI-33(Mp-pt)	2	0	8	62.5	12.5	25	0
		PI-33(Mp-pt)	2	1.5	11	18.1818	63.6364	18.1818	0
PI-Multifoliate(Q)	PI-MQ-(p)	PI-14(Mq-p)	3	0	12	58.3333	16.6667	25	0
		PI-14(Mq-p)	2	0	10	50	20	30	0
		PI-14(Mq-p)	1	0	8	25	0	75	0
		PI-29(Mq-p)	1	0	8	25	25	50	0
		PI-29(Mq-p)	2	0	9	44.4444	11.1111	44.4444	0
PI-Multifoliate(T)	PI-MT-(t)	PI-6(Mt-t)	3	0	3	33.3333	33.3333	33.3333	0
		PI-6(Mt-t)	1	0	7	28.5714	42.8571	28.5714	0
		PI-6(Mt-t)	3	7.9	16	62.5	31.25	6.25	0
		PI-6(Mt-t)	1	5.7	10	30	60	10	0
		PI-6(Mt-t)	1	21.7	21	61.9048	9.52381	28.5714	0
		PI-6(Mt-t)	4	2.5	14	78.5714	7.14286	14.2857	0
		PI-6(Mt-t)	3	0	28	57.1429	39.2857	3.57143	0
		PI-6(Mt-t)	2	18.375	16	43.75	43.75	12.5	0
	PI-MT-(p)	PI-23(Mt-pp)	2	12.3	9	55.5556	0	44.4444	0
		PI-23(Mt-pp)	2	11.7333	9	22.2222	44.4444	33.3333	0
PI-Trifoliate	PI-T-(t)	PI-1(Tt-t)	2	0	9	88.8889	11.1111	0	0
		PI-1(Tt-t)	2	0	20	95	0	5	0
		PI-1(Tt-t)	2	0	14	100	0	0	0
	PI-T-(q)	PI-1(Tt-q)	1	0	4	100	0	0	0

## Sheet: Sheet58
(2) Subcultured in RL media
Genotype	Plant No.	No. of shoots	Root Length (cm)	Total no. of leaves	Expression of multifoliate leaves after 30 days of culture
					%T	%Q	%P	%Hx	%Hp
Wardan-Trifoliate	W-35(Tt)	1	0	5	100	0	0	0	0
	W-36(Tt)	5	0	29	100	0	0	0	0
		4	0	8	100	0	0	0	0
	W-37(Tt)	3	0	11	100	0	0	0	0
PI-Pentafoliate	PI-2(Pp)	3	0	11	0	9.09091	90.9091	0	0
		3	4.8	7	14.2857	14.2857	71.4286	0	0
		2	10.95	5	0	0	100	0	0
		3	6.2	8	12.5	12.5	75	0	0
	PI-12(Pp)	2	0	11	9.09091	0	90.9091	0	0
		4	0	10	10	20	60	10	0
		3	0.9	10	0	0	100	0	0
		4	11.6	6	16.6667	0	83.3333	0	0
		5	16	13	7.69231	15.3846	76.9231	0	0
	PI-19(Pp)	2	5.3	14	7.14286	7.14286	85.7143	0	0
		2	0	10	10	30	60	0	0
	PI-45(Pp)	1	1.6	8	0	0	100	0	0
		1	15	7	0	0	100	0	0
	PI-46(Pp)	1	2	8	0	0	100	0	0
		1	11.05	9	0	0	100	0	0
PI-Multifoliate(P)	PI-3(Mp)	3	14	14	28.5714	35.7143	35.7143	0	0
		1	0	2	0	0	100	0	0
	PI-4(Mp)	2	0	17	29.4118	17.6471	52.9412	0	0
		3	0	16	37.5	6.25	56.25	0	0
		3	11.32	13	38.4615	0	61.5385	0	0
		4	0.8	13	7.69231	15.3846	76.9231	0	0
		2	0	3	66.6667	0	33.3333	0	0
	PI-5(Mp)	1	0	4	0	100	0	0	0
		3	11.2667	14	0	14.2857	85.7143	0	0
		3	0	7	14.2857	14.2857	71.4286	0	0
		2	0	6	0	16.6667	50	16.6667	16.6667
		4	0	9	0	0	100	0	0
	PI-9(Mp)	1	0	6	16.6667	0	83.3333	0	0
		1	0	1	0	0	100	0	0
		2	0	2	50	0	50	0	0
	PI-13(Mp)	3	12	11	0	0	100	0	0
		1	3.5	1	0	0	100	0	0
	PI-15(Mp)	3	6	7	28.5714	14.2857	57.1429	0	0
		2	0	3	66.6667	0	33.3333	0	0
	PI-16(Mp)	5	0	8	0	0	87.5	12.5	0
		5	0	7	0	28.5714	42.8571	28.5714	0
		1	0	1	100	0	0	0	0
	PI-17(Mp)	1	0	1	0	0	100	0	0
		2	0	7	0	14.2857	71.4286	14.2857	0
	PI-18(Mp)	2	7.7	7	14.2857	14.2857	71.4286	0	0
		1	3	1	0	100	0	0	0
		2	0	2	0	0	100	0	0
		1	0	1	0	0	100	0	0
		1	0	1	100	0	0	0	0
		4	0	13	23.0769	15.3846	53.8462	7.69231	0
		2	0	2	100	0	0	0	0
		3	0	2	0	0	100	0	0
	PI-24(Mp)	1	7.1	10	20	10	70	0	0
		3	0	3	66.6667	33.3333	0	0	0
		3	0	1	100	0	0	0	0
		3	0	3	66.6667	0	33.3333	0	0
		3	0	10	30	20	50	0	0
	PI-25(Mp)	6	4.4	15	6.66667	6.66667	86.6667	0	0
		5	2.45	8	0	12.5	75	12.5	0
		3	0	10	20	0	80	0	0
		3	0	14	28.5714	7.14286	57.1429	0	7.14286
		5	0	11	0	9.09091	90.9091	0	0
	PI-27(Mp)	4	0	3	33.3333	0	33.3333	33.3333	0
	PI-28(Mp)	5	4.175	15	40	0	60	0	0
		3	5.425	10	10	0	80	10	0
		6	7.42	12	16.6667	16.6667	66.6667	0	0
		3	0	12	25	33.3333	41.6667	0	0
	PI-32(Mp)	3	0	7	71.4286	0	28.5714	0	0
	PI-33(Mp)	4	0	14	28.5714	14.2857	57.1429	0	0
		3	0	13	23.0769	0	76.9231	0	0
		2	5.15	6	16.6667	0	83.3333	0	0
		1	0	1	0	0	100	0	0
		3	0	10	30	10	60	0	0
		4	0	5	80	20	0	0	0
		1	0	1	0	0	100	0	0
		2	0	2	50	0	50	0	0
PI-Multifoliate(Q)	PI-8(Mq)	2	0	2	100	0	0	0	0
		1	8	9	55.5556	33.3333	11.1111	0	0
	PI-11(Mq)	3	0	9	11.1111	44.4444	44.4444	0	0
		4	0	3	100	0	0	0	0
		3	0	12	0	0	91.6667	8.33333	0
	PI-14(Mq)	12	0	14	0	14.2857	78.5714	7.14286	0
		3	0	12	8.33333	8.33333	75	8.33333	0
		3	0	7	0	28.5714	71.4286	0	0
	PI-29(Mq)	4	0	9	0	0	100	0	0
		1	0	1	0	0	0	100	0
		1	0	1	0	0	100	0	0
		3	0	3	0	33.3333	33.3333	0	33.3333
		1	0	1	0	0	100	0	0
		3	8.56667	3	0	0	33.3333	66.6667	0
		1	0	1	0	0	100	0	0
		1	0	1	0	0	100	0	0
		1	0	1	0	100	0	0	0
	PI-30(Mq)	3	0	3	33.3333	33.3333	33.3333	0	0
PI-Multifoliate(T)	PI-6(Mt)	2	0	8	62.5	0	37.5	0	0
	PI-10(Mt)	1	0	2	50	50	0	0	0
	PI-23(Mt)	6	3.05	14	28.5714	21.4286	50	0	0
		1	0	2	0	0	100	0	0
PI-Trifoliate	PI-1(Tt)	3	0	9	11.1111	33.3333	55.5556	0	0
		5	3.85	8	62.5	0	37.5	0	0
		8	5.4	9	22.2222	55.5556	22.2222	0	0
		2	0	7	57.1429	28.5714	14.2857	0	0
		3	0	7	85.7143	14.2857	0	0	0

## Sheet: Sheet57
Invitro axillary bud multiplication
(1) Cultured in LSP3 media
Genotype	Plant No.	Initial leaf arrangement	Explant	No. of shoots	Total no. of leaves	Expression of multifoliate leaves after 30 days of culture
						%T	%Q	%P	%Hx	%Hp
Wardan-Trifoliate	W-35(Tt)	33333	3	8	8	100	0	0	0	0
	W-36(Tt)	3333	3	8	8	100	0	0	0	0
	W-37(Tt)	333333	3	6	6	100	0	0	0	0
	W-38(Tt)	3333	3	8	8	100	0	0	0	0
	W-39(Tt)	3333	3	2	9	100	0	0	0	0
	W-40(Tt)	333	3	2	4	100	0	0	0	0
	W-41(Tt)	33	3	4	15	100	0	0	0	0
	W-42(Tt)	3333	3	2	8	100	0	0	0	0
	W-43(Tt)	33333	3	2	5	100	0	0	0	0
PI-Pentafoliate	PI-2(Pp)	5555	5	14	17	17.6471	17.6471	64.7059	0	0
	PI-7(Pp)	555	5	1	5	40	40	20	0	0
	PI-12(Pp)	55555	5	18	19	5.26316	5.26316	89.4737	0	0
	PI-19(Pp)	5555	5	4	5	0	20	80	0	0
	PI-44(Pp)	55555	5	2	2	0	0	100	0	0
	PI-45(Pp)	55555	5	2	11	0	0	100	0	0
	PI-46(Pp)	555555	5	5	12	0	0	100	0	0
PI-Multifoliate(P)	PI-3(Mp)	3455	5	4	9	33.3333	33.3333	33.3333	0	0
	PI-4(Mp)	4355	5	13	14	21.4286	14.2857	64.2857	0	0
	PI-5(Mp)	34555	5	12	13	7.69231	7.69231	61.5385	23.0769	0
	PI-9(Mp)	33435	5	4	5	40	0	60	0	0
	PI-13(Mp)	34335	5	4	5	20	20	60	0	0
	PI-15(Mp)	334345	5	3	4	25	25	50	0	0
	PI-16(Mp)	3455	5	11	13	7.69231	0	76.9231	7.69231	7.69231
	PI-17(Mp)	354355	5	5	5	20	0	80	0	0
	PI-18(Mp)	3334345	5	7	7	14.2857	28.5714	57.1429	0	0
	PI-21(Mp)	334345	5	8	9	11.1111	22.2222	44.4444	22.2222	0
	PI-24(Mp)	3445555	5	9	12	50	25	25	0	0
	PI-25(Mp)	3344444	5	18	19	15.7895	5.26316	78.9474	0	0
	PI-27(Mp)	3345	5	1	1	0	0	100	0	0
	PI-28(Mp)	3435	5	18	18	27.7778	5.55556	61.1111	5.55556	0
	PI-32(Mp)	333545	5	3	3	33.3333	33.3333	33.3333	0	0
	PI-33(Mp)	33555	5	18	18	27.777	16.666	50	5.555	0
	PI-47(Mp)	3355	5	1	2	0	50	50	0	0
	PI-48(Mp)	434535	5	2	4	0	50	50	0	0
	PI-49(Mp)	33533545	5	2	4	0	0	100	0	0
	PI-50(Mp)	33453	5	3	8	12.5	0	87.5	0	0
	PI-51(Mp)	335555	5	3	9	33.3333	11.1111	55.5556	0	0
	PI-52(Mp)	3333455	5	2	3	33.3333	33.3333	33.3333	0	0
	PI-53(Mp)	335555	5	1	1	0	0	100	0	0
	PI-54(Mp)	5354435	5	2	4	50	0	50	0	0
	PI-55(Mp)	3454555	5	1	1	0	0	100	0	0
	PI-56(Mp)	545	5	3	3	100	0	0	0	0
	PI-57(Mp)	33353	5	1	1	0	100	0	0	0
	PI-58(Mp)	533533	5	2	2	50	50	0	0	0
	PI-59(Mp)	345555	5	1	2	50	50	0	0	0
	PI-60(Mp)	45435	5	2	2	50	50	0	0	0
	PI-61(Mp)	3355	5	1	1	0	0	100	0	0
	PI-62(Mp)	3555555	5	2	3	66.6667	33.3333	0	0	0
	PI-63(Mp)	53333	5	2	6	100	0	0	0	0
	PI-64(Mp)	3354	5	1	1	100	0	0	0	0
	PI-65(Mp)	3355	5	1	3	100	0	0	0	0
	PI-66(Mp)	335333	5	1	4	50	0	50	0	0
	PI-67(Mp)	3555	5	1	1	100	0	0	0	0
	PI-68(Mp)	355	5	1	1	0	0	100	0	0
	PI-69(Mp)	5353	5	2	3	100	0	0	0	0
	PI-70(Mp)	33355	5	1	5	0	20	80	0	0
PI-Multifoliate(Q)	PI-8(Mq)	33354	4	3	6	66.6667	33.3333	0	0	0
	PI-11(Mq)	534	4	7	7	0	0	100	0	0
	PI-14(Mq)	333534	4	18	17	0	5.88235	82.3529	11.7647	0
	PI-20(Mq)	3334	4	2	4	75	25	0	0	0
	PI-29(Mq)	334	4	15	16	6.25	18.75	62.5	6.25	6.25
	PI-30(Mq)	3354	4	2	4	50	0	50	0	0
PI-Multifoliate(T)	PI-6(Mt)	5335	3	11	14	35.7143	35.7143	28.5714	0	0
	PI-10(Mt)	3353	3	1	2	0	50	50	0	0
	PI-22(Mt)	35353	3	2	7	0	28.5714	71.4286	0	0
	PI-23(Mt)	4553	3	5	6	100	0	0	0	0
	PI-26(Mt)	343	3	3	4	100	0	0	0	0
PI-Trifoliate	PI-1(Tt)	33333	3	15	23	56.5217	26.087	17.3913	0	0

## Sheet: Sheet28
Leaf arrangement on multifoliate plants of segregating progenies of T. alexandrinum x T. apertum after second cut in (%) year 2
Progeny	No. of plants		Trifoliate	Quadrifoliate	Pentafoliate
04-35-1-1	1	Average	28.125	21.875	50
		Range	28.125	21.875	50
04-37-2-1	6	Average	0.462963	6.70034	92.8367
		Range	0.00-2.78	0.00-20.00	80.00-100
04-37-2-2	13	Average	8.20515	12.1608	79.634
		Range	0.00-51.61	0.00-35.71	29.03-100
04-39-1-1	7	Average	0	0	100
		Range	0	0	100
04-39-1-2	8	Average	0.893997	3.55946	95.5465
		Range	0.00-3.70	0.00-13.79	82.76-100
04-39-4-1	8	Average	12.5	0	87.5
		Range	0.00-100	0	0.00-100
04-39-5-1	1	Average	0	0	100
		Range	0	0	100
04-39-7-1	2	Average	55	0	45
		Range	10.00-100	0	0.00-90.00
04-39-7-2	6	Average	6.73395	11.854	81.4121
		Range	0.00-21.88	0.00-35.71	60.71-96.15
04-39-8-1	5	Average	40.8661	18.6691	40.4648
		Range	31.58-50.00	7.14-24.00	34.29-44.74
04-39-10-1	8	Average	1.65323	2.41935	95.9274
		Range	0.00-10.00	0.00-12.90	87.10-100
04-39-10-2	8	Average	6.73467	5.53353	87.7318
		Range	0.00-36.36	0.00-13.64	50.00-100
04-39-10-3	1	Average	0	0	100
		Range	0	0	100
04-39-12-1	8	Average	10.541	10.3765	79.0825
		Range	0.00-32.26	0.00-29.03	38.71-100
04-39-15-1	2	Average	3.44828	1.72414	94.8276
		Range	0.00-6.90	0.00-3.45	89.66-100
04-39-17-1	7	Average	1.42857	0.714286	97.8571
		Range	0.00-10.00	0.00-5.00	85.00-100
04-39-18-1	5	Average	0	0	100
		Range	0	0	100
04-39-21-1	4	Average	10.2251	1.55651	88.2184
		Range	0.00-30.56	0.00-3.45	66.67-100
04-39-23-1	4	Average	1.9765	4.00641	94.0171
		Range	0.00-5.13	0.00-7.69	87.18-100
04-39-26-1	1	Average	3.22581	6.45161	90.3226
		Range	3.22581	6.45161	90.3226
04-39-29-1	5	Average	56.3105	5.14113	38.5484
		Range	0.00-100	0.00-22.58	0.00-100
04-39-29-2	3	Average	88.8889	6.66667	4.44444
		Range	66.67-100	0.00-20.00	0.00-13.33
04-47-1-1	2	Average	0	0	100
		Range	0	0	100
04-47-3-1	8	Average	42.1028	10.2124	47.6848
		Range	0.00-100	0.00-42.31	0.00-100
04-47-3-2	1	Average	0	0	100
		Range	0	0	100
04-47-3-3	5	Average	0	0	100
		Range	0	0	100
04-47-3-4	2	Average	16.6667	12.963	70.3704
		Range	0.00-33.33	0.00-25.93	40.74-100
04-47-3-5	2	Average	39.6011	18.8746	41.5242
		Range	38.46-40.74	18.52-19.23	40.74-42.31
04-47-3-6	3	Average	34.2392	17.491	48.2698
		Range	4.55-54.84	0.00-26.67	19.35-95.45
04-47-3-7	2	Average	53.0303	9.09091	37.8788
		Range	6.06-100	0.00-18.18	0.00-75.76
04-47-3-8	7	Average	58.3242	7.87157	33.8042
		Range	0.00-100	0.00-21.21	0.00-100
04-47-4-1	1	Average	84.6154	15.3846	0
		Range	84.6154	15.3846	0
04-47-4-2	3	Average	57.2222	7.77778	35
		Range	13.33-100	0.00-16.67	0.00-80.00
04-47-5-1	1	Average	0	0	100
		Range	0	0	100
04-47-5-2	1	Average	30.7692	0	69.2308
		Range	30.7692	0	69.2308
04-47-5-3	2	Average	69.1176	10.2941	20.5882
		Range	38.24-100	0.00-20.59	0.00-41.18
04-47-5-4	6	Average	0	0.574713	99.4253
		Range	0	0.00-3.45	96.55-100
04-47-5-5	6	Average	32.4699	20.7847	46.7454
		Range	16.00-50.00	12.00-34.38	25.00-72.00
04-47-5-6	2	Average	11.7647	14.7059	73.5294
		Range	0.00-23.53	0.00-29.41	47.06-100
04-47-5-7	6	Average	14.4444	2.22222	83.3333
		Range	0-86.67	0-13.33	0-100
04-56-1-1	6	Average	33.3333	0	66.6667
		Range	0.00-100	0	0.00-100
04-56-1-2	8	Average	1.36925	1.77696	96.8538
		Range	0.00-4.17	0.00-8.33	87.50-100
04-56-1-3	4	Average	0	3.33333	96.6667
		Range	0	0.00-13.33	86.67-100
04-56-1-4	9	Average	0	0	100
		Range	0	0	100
04-56-1-5	4	Average	0	1.47059	98.5294
		Range	0	0.00-5.88	94.12-100
04-56-1-6	2	Average	100	0	0
		Range	100	0	0
04-56-1-7	2	Average	0	3.0303	96.9697
		Range	0	0.00-6.06	93.94-100
04-56-1-8	2	Average	0	4	96
		Range	0	0.00-8.00	92.00-100
04-56-1-9	5	Average	54.5697	3.94907	41.4812
		Range	9.68-100	0.00-9.38	0.00-90.32
04-56-1-10	1	Average	0	0	100
		Range	0	0	100

## Sheet: Sheet26
Leaf arrangement on multifoliate plants in progenies of Penta-1 after second cut in (%) year 2
Progeny	No. of plants		Trifoliate	Quadrifoliate	Pentafoliate	Hexafoliate	Heptafoliate
06-1-1	12	Average	0	0	100	0	0
		Range	0	0	100	0	0
06-1-2	3	Average	0	5.71429	94.2857	0	0
		Range	0	0.00-17.14	82.86-100	0	0
06-1-3	11	Average	0.519481	1.2987	98.1818	0	0
		Range	0.00-5.71	0.00-14.29	80.00-100	0	0
06-2-1	4	Average	0	0	100	0	0
		Range	0	0	100	0	0
06-2-2	5	Average	0	0	100	0	0
		Range	0	0	100	0	0
06-2-3	5	Average	0	0	100	0	0
		Range	0	0	100	0	0
06-2-4	7	Average	0	0	100	0	0
		Range	0	0	100	0	0
06-2-5	8	Average	0	0	100	0	0
		Range	0	0	100	0	0
06-3-1	9	Average	24.183	3.51489	72.3021	0	0
		Range	0.00-100	0.00-29.41	0.00-100	0	0
06-3-2	7	Average	6.58511	6.37947	87.0354	0	0
		Range	0.00-29.63	0.00-18.42	62.96-100	0	0
06-3-3	9	Average	6.3651	5.62353	88.0114	0	0
		Range	0.00-37.93	0.00-34.48	27.59-100	0	0
06-3-4	9	Average	11.8664	1.46705	86.6666	0	0
		Range	0.00-100	0.00-7.14	0.00-100	0	0
06-3-5	13	Average	18.5182	16.1543	65.3275	0	0
		Range	0.00-64.29	0.00-40.74	18.52-100	0	0
06-4-1	13	Average	2.66272	1.77515	95.5621	0	0
		Range	0.00-34.62	0.00-23.08	42.31-100	0	0
06-4-2	9	Average	0	0	100	0	0
		Range	0	0	100	0	0
06-4-3	7	Average	0	0	100	0	0
		Range	0	0	100	0	0
06-5-1	4	Average	0	0	100	0	0
		Range	0	0	100	0	0
06-5-2	14	Average	1.54221	2.0901	95.8807	0.487013	0
		Range	0.00-12.50	0.00-15.63	70.45-100	0.00-6.82	0
06-6-1	11	Average	0	0	100	0	0
		Range	0	0	100	0	0
06-6-2	10	Average	4.87237	5.58612	89.5415	0	0
		Range	0.00-43.24	0.00-18.92	37.84-100	0	0
06-7-1	4	Average	0	0	100	0	0
		Range	0	0	100	0	0
06-7-2	4	Average	0	0	100	0	0
		Range	0	0	100	0	0
06-7-3	15	Average	30.1115	3.16714	66.5063	0.215054	0
		Range	0.00-100	0.00-25.81	0.00-100	0.00-3.23	0
06-7-4	12	Average	0	0	100	0	0
		Range	0	0	100	0	0
06-7-5	14	Average	0	0	100	0	0
		Range	0	0	100	0	0
06-8-1	9	Average	0	0	100	0	0
		Range	0	0	100	0	0
06-8-2	13	Average	0	0	100	0	0
		Range	0	0	100	0	0
06-9-1	12	Average	1.44626	4.89802	90.1727	3.28919	0.193798
		Range	0.00-8.33	0.00-27.78	50.00-100	0.00-25.58	0.00-2.33
06-9-2	13	Average	1.57791	4.15709	90.186	2.99376	1.08524
		Range	0.00-20.51	0.00-23.08	56.41-100	0.00-20.00	0.00-8.11
06-9-3	10	Average	0	0	100	0	0
		Range	0	0	100	0	0
06-9-4	12	Average	0	0	100	0	0
		Range	0	0	100	0	0
06-9-5	5	Average	0	0	100	0	0
		Range	0	0	100	0	0
06-10-1	11	Average	0.4662	0.460373	99.0734	0	0
		Range	0.00-5.13	0.00-2.56	92.31-100	0	0
06-11-1	13	Average	0	0	100	0	0
		Range	0	0	100	0	0
06-11-2	19	Average	0	0	100	0	0
		Range	0	0	100	0	0
06-11-3	14	Average	0	0	100	0	0
		Range	0	0	100	0	0
06-11-4	20	Average	0	0	100	0	0
		Range	0	0	100	0	0
06-12-1	15	Average	3.5948	10.3948	84.6215	1.11111	0.277778
		Range	0.00-15.63	0.00-37.50	50.00-100	0.00-16.67	0.00-4.17
06-12-2	10	Average	0	0	100	0	0
		Range	0	0	100	0	0
06-12-3	13	Average	0.213675	0.213675	99.5726	0	0
		Range	0.00-2.78	0.00-2.78	94.44-100	0	0
06-13-1	12	Average	0.758637	1.57563	95.2848	2.38095	0
		Range	0.00-7.14	0-11.76	57.14-100	0.00-28.57	0
06-13-2	12	Average	48.3004	16.3436	35.3559	0	0
		Range	0.00-100	0.00-44.83	0.00-100	0	0
06-13-3	9	Average	0	0	100	0	0
		Range	0	0	100	0	0
06-14-1	6	Average	2.5641	3.20513	94.2308	0	0
		Range	0.00-7.69	0.00-11.54	80.77-100	0	0
06-14-2	14	Average	0	0	100	0	0
		Range	0	0	100	0	0
06-14-3	13	Average	0	0	100	0	0
		Range	0	0	100	0	0
06-14-4	6	Average	0	0	100	0	0
		Range	0	0	100	0	0
06-14-5	13	Average	0	0	100	0	0
		Range	0	0	100	0	0
06-15-1	15	Average	0	0	100	0	0
		Range	0	0	100	0	0
06-15-2	4	Average	25	0	75	0	0
		Range	0.00-100	0	0.00-100	0	0
06-15-3	4	Average	0	0	100	0	0
		Range	0	0	100	0	0
06-15-4	12	Average	0	0	100	0	0
		Range	0	0	100	0	0
06-16-1	8	Average	0	0	100	0	0
		Range	0	0	100	0	0
06-16-2	11	Average	0.443459	1.77384	97.7827	0	0
		Range	0.00-4.88	0.00-19.51	75.61-100	0	0
06-16-3	13	Average	0	0	100	0	0
		Range	0	0	100	0	0
06-16-4	13	Average	0	0	100	0	0
		Range	0	0	100	0	0
06-16-5	5	Average	0	0	100	0	0
		Range	0	0	100	0	0
06-16-6	12	Average	0	0	100	0	0
		Range	0	0	100	0	0
06-17-1	14	Average	8.56879	3.61655	85.3659	1.97525	0.473485
		Range	0.00-100	0.00-19.05	0.00-100	0.00-12	0.00-4.55
06-17-2	18	Average	0	0	99.7821	0.217865	0
		Range	0	0	96.08-100	0.00-3.92	0
06-17-3	10	Average	0	0	100	0	0
		Range	0	0	100	0	0
06-17-4	15	Average	0	0	100	0	0
		Range	0	0	100	0	0
06-18-1	14	Average	0	0	100	0	0
		Range	0	0	100	0	0
06-18-2	19	Average	0	0	100	0	0
		Range	0	0	100	0	0
06-18-3	16	Average	0	0	100	0	0
		Range	0	0	100	0	0
06-18-4	4	Average	25	0	75	0	0
		Range	0.00-100	0	0.00-100	0	0
06-18-5	16	Average	0	0	100	0	0
		Range	0	0	100	0	0
06-19-1	5	Average	0	0	100	0	0
		Range	0	0	100	0	0
06-19-2	10	Average	11.1085	1.8407	87.0508	0	0
		Range	0.00-100	0.00-7.50	0.00-100	0	0
06-20-1	2	Average	1.06383	1.06383	97.8723	0	0
		Range	0.00-2.13	0.00-2.13	95.74-100	0	0
06-20-2	14	Average	2.1164	0.793651	97.0899	0	0
		Range	0.00-29.63	0.00-11.11	59.26-100	0	0
06-21-1	4	Average	0.581395	4.06977	95.3488	0	0
		Range	0.00-2.33	0.00-16.28	81.40-100	0	0
06-22-1	4	Average	4.60526	1.97368	93.4211	0	0
		Range	0.00-18.42	0.00-7.89	73.68-100	0	0
06-22-2	4	Average	0	0	100	0	0
		Range	0	0	100	0	0
06-23-1	4	Average	0	0	100	0	0
		Range	0	0	100	0	0
06-23-2	13	Average	0.854701	0.512821	98.1197	0.512821	0
		Range	0.00-11.11	0.00-6.67	75.56-100	0.00-6.67	0
06-23-3	10	Average	0.967742	2.58065	96.4516	0	0
		Range	0.00-9.68	0.00-25.81	64.52-100	0	0
06-23-4	9	Average	12.9403	6.41926	80.6405	0	0
		Range	0.00-100	0.00-20.00	0.00-100	0	0
06-24-1	13	Average	0	0	100	0	0
		Range	0	0	100	0	0
06-24-2	15	Average	0	0.487805	99.0244	0.487805	0
		Range	0	0.00-7.32	85.37-100	0.00-7.32	0
06-24-3	11	Average	0.21645	1.94805	97.4026	0.4329	0
		Range	0.00-2.38	0.00-21.43	71.43-100	0.00-4.76	0
06-25-1	9	Average	0	0	100	0	0
		Range	0	0	100	0	0
06-25-2	12	Average	0.416667	0.208333	98.9729	0.208333	0.193798
		Range	0.00-5.00	0.00-2.50	90.00-100	0.00-2.50	0.00-2.33
06-26-1	4	Average	0	0	100	0	0
		Range	0	0	100	0	0
06-28-1	8	Average	0	0	100	0	0
		Range	0	0	100	0	0
06-29-1	10	Average	0	0.526316	99.4737	0	0
		Range	0	0.00-5.26	94.74-100	0	0
06-29-2	9	Average	0.653595	4.86798	94.4784	0	0
		Range	0.00-2.94	0.00-14.71	82.35-100	0	0
06-30-1	12	Average	69.184	4.69245	26.1235	0	0
		Range	0.00-100	0.00-27.27	0.00-100	0	0

## Sheet: Sheet18
Leaf arrangement on multifoliate plants in progenies of Penta-1 before cut in (%) year 2
Progeny	No. of plants		Trifoliate	Quadrifoliate	Pentafoliate	Hexafoliate	Heptafoliate
06-1-1	12	Average	2.44108	10.8375	86.7214	0	0
		Range	0.00-11.11	0.00-33.33	66.67-100	0	0
06-1-2	3	Average	23.9177	0	76.0823	0	0
		Range	18.18-28.57	0	71.43-81.82	0	0
06-1-3	11	Average	10.2683	9.54283	80.1889	0	0
		Range	0.00-30.00	0.00-30.00	60.00-90.91	0	0
06-2-1	4	Average	9.16667	3.33333	84.1667	3.33333	0
		Range	0.00-20.00	0.00-13.33	66.67-100	0.00-13.33	0
06-2-2	5	Average	16.6667	0	83.3333	0	0
		Range	16.6667	0	83.3333	0	0
06-2-3	5	Average	20	6.66667	73.3333	0	0
		Range	0.00-33.33	0.00-25.00	50.00-100	0	0
06-2-4	7	Average	9.43878	1.78571	78.9966	6.20748	3.57143
		Range	0.00-16.67	0.00-12.50	62.50-100	0.00-16.67	0.00-25.00
06-2-5	8	Average	7.5496	4.72222	85.6448	0	2.08333
		Range	0.00-16.67	0.00-16.67	50.00-100	0	0.00-16.67
06-3-1	9	Average	40.5872	5.66563	53.7472	0	0
		Range	9.09-100	0.00-18.18	0.00-18.82	0	0
06-3-2	7	Average	18.0519	12.0779	69.8701	0	0
		Range	0.00-25.00	0.00-36.36	60.00-81.82	0	0
06-3-3	9	Average	12.3681	5.45455	82.1773	0	0
		Range	0.00-37.50	0.00-20.00	62.50-100	0	0
06-3-4	9	Average	22.5842	19.3266	58.0892	0	0
		Range	0.00-100	0.00-60.00	0.00-100	0	0
06-3-5	13	Average	16.8225	12.3707	70.8067	0	0
		Range	0.00-44.44	0.00-33.33	44.44-100	0	0
06-4-1	13	Average	16.5634	13.181	70.2556	0	0
		Range	0.00-40.00	0.00-42.86	28.57-100	0	0
06-4-2	9	Average	7.94533	2.5	89.5547	0	0
		Range	0.00-14.29	0.00-12.50	75.00-100	0	0
06-4-3	7	Average	8.10245	12.7165	79.1811	0	0
		Range	0.00-18.18	0.00-33.33	66.67-90.00	0	0
06-5-1	4	Average	12.5	11.25	76.25	0	0
		Range	0.00-37.50	0.00-20.00	50.00-87.50	0	0
06-5-2	14	Average	7.55952	3.80952	88.631	0	0
		Range	0.00-83.33	0.00-20.00	0.00-100	0	0
06-6-1	11	Average	11.0399	6.9697	81.9904	0	0
		Range	0.00-18.18	0.00-16.67	66.67-100	0	0
06-6-2	10	Average	24.2677	8.45238	67.2799	0	0
		Range	0.00-81.82	0.00-42.86	18.18-90.91	0	0
06-7-1	4	Average	8.77914	2.08333	89.1375	0	0
		Range	7.69-10.00	0.00-8.33	83.33-92.31	0	0
06-7-2	4	Average	9.6645	7.51082	79.4913	0	3.33333
		Range	7.14-13.33	0.00-14.29	66.67-90.91	0	0.00-13.33
06-7-3	15	Average	42.7458	9.66162	41.6162	4.12458	1.85185
		Range	0.00-100	0.00-25.00	0.00-90.91	0.00-33.33	0.00-16.67
06-7-4	12	Average	11.3465	6.60744	82.0461	0	0
		Range	0.00-30.00	0.00-22.22	55.56-91.67	0	0
06-7-5	14	Average	15.3745	4.46411	79.1018	1.05965	0
		Range	7.14-27.27	0.00-28.57	50.00-90.91	0.00-7.69	0
06-8-1	9	Average	8.43996	9.67452	81.8855	0	0
		Range	0.00-16.67	0.00-20.00	66.67-90.91	0	0
06-8-2	13	Average	15.3519	11.5418	73.1063	0	0
		Range	0.00-50.00	0.00-37.50	12.50-100	0	0
06-9-1	12	Average	16.8491	8.04233	68.9472	6.16132	0
		Range	10.00-25.00	0.00-14.29	50.00-83.33	0.00-25.00	0
06-9-2	13	Average	7.786	7.10224	85.1118	0	0
		Range	0.00-20.00	0.00-22.22	66.67-100	0	0
06-9-3	10	Average	7.43687	7.37374	85.1894	0	0
		Range	0.00-22.22	0.00-33.33	55.56-100	0	0
06-9-4	12	Average	6.46254	9.62963	83.9078	0	0
		Range	0.00-16.67	0.00-37.50	50.00-100	0	0
06-9-5	5	Average	12.3586	3.81818	83.8232	0	0
		Range	0.00-20.00	0.00-10.00	70.00-100	0	0
06-10-1	11	Average	8.54877	5.57675	85.8745	0	0
		Range	0.00-25.00	0.00-18.18	72.73-100	0	0
06-11-1	13	Average	11.7327	7.95649	80.3108	0	0
		Range	0.00-30.00	0.00-27.27	63.64-100	0	0
06-11-2	19	Average	6.42743	4.99203	87.6635	0.917065	0
		Range	0.00-25.00	0.00-33.33	50.00-100	0.00-9.09	0
06-11-3	14	Average	13.447	12.6533	73.8997	0	0
		Range	9.09-22.22	0.00-44.44	44.44-83.33	0	0
06-11-4	20	Average	3.04167	2.83333	82.0435	6.62121	5.46032
		Range	0.00-13.33	0.00-20.00	53.33-100	0.00-25.00	0.00-26.67
06-12-1	15	Average	20.1204	18.9738	56.2562	4.64957	0
		Range	0.00-63.64	0.00-55.56	22.22-88.89	0.00-30.00	0
06-12-2	10	Average	8.56818	0	91.4318	0	0
		Range	0.00-20.00	0	80.00-100	0	0
06-12-3	13	Average	6.35512	4.23077	85.4825	3.93162	0
		Range	0.00-12.50	0.00-25.00	62.50-100	0.00-20.00	0
06-13-1	12	Average	13.1154	14.0846	72.8	0	0
		Range	0.00-60.00	0.00-40.00	0.00-100	0	0
06-13-2	12	Average	73.3466	9.29233	17.3611	0	0
		Range	0.00-100	0.00-33.33	0.00-100	0	0
06-13-3	9	Average	8.63248	5.78348	85.584	0	0
		Range	0.00-50.00	0.00-20.00	50.00-100	0	0
06-14-1	6	Average	11.9192	9.84848	78.2323	0	0
		Range	0.00-20.00	0.00-33.33	50.00-100	0	0
06-14-2	14	Average	6.43218	9.28932	84.2785	0	0
		Range	0.00-18.18	0.00-30.00	63.64-100	0	0
06-14-3	13	Average	13.1291	9.49328	77.3776	0	0
		Range	0.00-57.14	0.00-42.86	0.00-100	0	0
06-14-4	6	Average	14.8822	8.73737	76.3805	0	0
		Range	0.00-50.00	0.00-33.33	16.67-100	0	0
06-14-5	13	Average	27.094	10.4915	62.4145	0	0
		Range	0.00-100	0.00-25.00	0.00-100	0	0
06-15-1	15	Average	4.91582	8.10101	86.9832	0	0
		Range	0.00-22.22	0.00-25.00	66.67-100	0	0
06-15-2	4	Average	36.1742	8.90152	54.9242	0	0
		Range	0.00-100	0.00-27.27	0.00-100	0	0
06-15-3	4	Average	9.79167	3.125	87.0833	0	0
		Range	0.00-16.67	0.00-12.50	75.00-100	0	0
06-15-4	12	Average	7.93981	4.12037	87.9398	0	0
		Range	0.00-37.50	0.00-11.11	62.50-100	0	0
06-16-1	8	Average	15.6944	16.7077	67.5979	0	0
		Range	0.00-55.56	0.00-27.27	22.22-100	0	0
06-16-2	11	Average	16.0645	10.5916	73.3438	0	0
		Range	0.00-66.67	0.00-25.00	33.33-90.91	0	0
06-16-3	13	Average	1.46853	6.97885	91.5526	0	0
		Range	0.00-10.00	0.00-18.18	80.00-100	0	0
06-16-4	13	Average	3.00117	5.06743	91.9314	0	0
		Range	0.00-12.50	0.00-14.29	81.82-100	0	0
06-16-5	5	Average	23.4921	3.33333	73.1746	0	0
		Range	0.00-66.67	0.00-16.67	16.67-100	0	0
06-16-6	12	Average	11.8491	10.1293	78.0216	0	0
		Range	0.00-30.00	0.00-28.57	57.14-90.00	0	0
06-17-1	14	Average	21.636	8.98268	69.3813	0	0
		Range	0.00-100	0.00-33.33	0.00-100	0	0
06-17-2	18	Average	14.826	3.16599	82.0081	0	0
		Range	0.00-30.00	0.00-12.50	66.67-100	0	0
06-17-3	10	Average	13.3883	6.96703	79.6447	0	0
		Range	0.00-28.57	0.00-30.00	57.14-100	0	0
06-17-4	15	Average	12.8446	5.65103	81.5043	0	0
		Range	0.00-20.00	0.00-22.22	66.67-100	0	0
06-18-1	14	Average	11.1655	12.963	75.8715	0	0
		Range	0.00-28.57	0.00-50.00	33.33-88.89	0	0
06-18-2	19	Average	10.1049	8.01377	81.4427	0.438596	0
		Range	0.00-22.22	0.00-27.27	54.55-100	0.00-8.33	0
06-18-3	16	Average	7.76583	6.78143	83.6819	1.77083	0
		Range	0.00-20.00	0.00-18.18	60.00-100	0.00-20.00	0
06-18-4	4	Average	35.4365	23.8889	40.6746	0	0
		Range	10.00-66.67	0.00-40.00	0.00-57.14	0	0
06-18-5	16	Average	23.4243	9.80939	66.7663	0	0
		Range	0.00-66.67	0.00-18.18	16.67-100	0	0
06-19-1	5	Average	17.6768	12.2626	68.0606	2	0
		Range	0.00-50.00	0.00-22.22	50.00-80.00	0.00-10.00	0
06-19-2	10	Average	10.6995	9.67172	79.6288	0	0
		Range	0.00-27.27	0.00-27.27	45.45-100	0	0
06-20-1	2	Average	37.7778	21.1111	41.1111	0	0
		Range	20.00-55.56	20.00-22.22	22.22-60.00	0	0
06-20-2	14	Average	27.1158	15.8856	56.9986	0	0
		Range	0.00-100	0.00-55.56	0.00-91.67	0	0
06-21-1	4	Average	14.0873	10.5159	75.3968	0	0
		Range	0.00-28.57	0.00-16.67	57.14-100	0	0
06-22-1	4	Average	28.4921	27.3413	44.1667	0	0
		Range	0.00-60.00	0.00-57.14	0.00-100	0	0
06-22-2	4	Average	11.8182	2.5	85.6818	0	0
		Range	0.00-27.27	0.00-10.00	72.73-100	0	0
06-23-1	4	Average	2.27273	8.52273	89.2045	0	0
		Range	0.00-9.09	0.00-25.00	75.00-100	0	0
06-23-2	13	Average	22.6224	24.6215	52.7561	0	0
		Range	0.00-42.86	0.00-57.14	14.29-90.91	0	0
06-23-3	10	Average	17.0238	11.5877	71.3885	0	0
		Range	0.00-30.00	0.00-22.22	57.14-90.91	0	0
06-23-4	9	Average	19.3827	14.0741	66.5432	0	0
		Range	0.00-100	0.00-33.33	0.00-100	0	0
06-24-1	13	Average	5.92796	5.86386	88.2082	0	0
		Range	0.00-14.29	0.00-20.00	77.78-100	0	0
06-24-2	15	Average	13.9293	10.2222	75.8485	0	0
		Range	0.00-27.27	0.00-20.00	66.67-100	0	0
06-24-3	11	Average	13.8974	4.56382	81.5388	0	0
		Range	0.00-40.00	0.00-11.11	60.00-100	0	0
06-25-1	9	Average	5.37037	9.25926	85.3704	0	0
		Range	0.00-20.00	0.00-40.00	50.00-100	0	0
06-25-2	12	Average	14.7491	6.33908	78.9119	0	0
		Range	0.00-42.86	0.00-20.00	42.86-100	0	0
06-26-1	4	Average	8.03571	12.5	79.4643	0	0
		Range	0.00-25.00	0.00-25.00	75.00-92.86	0	0
06-28-1	8	Average	8.83356	4.80578	86.3607	0	0
		Range	0.00-22.22	0.00-12.50	66.67-100	0	0
06-29-1	10	Average	5.01263	6.73291	88.2545	0	0
		Range	0.00-18.18	0.00-15.38	75.00-100	0	0
06-29-2	9	Average	13.0108	12.3362	74.653	0	0
		Range	0.00-25.00	0.00-37.50	55.56-87.50	0	0
06-30-1	12	Average	76.3636	3.51852	20.1178	0	0
		Range	9.09-100	0.00-11.11	0.00-90.91	0	0

[truncated: 5 more sheets: Sheet17, Sheet16, Sheet12, Sheet6, Sheet4]
